# Supplementary material for: Investigation of the relationship between the cycle performance and the electronic structure in LiAlxMn2−xO4 (x = 0 and 0.2) using soft X-ray spectroscopy
Source: Royal Society of Chemistry journal article supplement (doi:10.1039/c7cp02070h), 2017-01-01
Supplement: c7cp02070h1.pdf [file c7cp02070h1.pdf]

*Supporting Information*

**Relationship between the cycle performance and electronic structure  
in  $\text{LiAl}_x\text{Mn}_{2-x}\text{O}_4$  ( $x = 0$  and  $0.2$ ) as seen via soft X-ray spectroscopy**

Daisuke Asakura<sup>1\*</sup>, Yusuke Nanba<sup>1#</sup>, Yuki Makinose, Hirofumi Matsuda and Eiji Hosono<sup>1\*</sup>

<sup>1</sup>*Research Institute for Energy Conservation, National Institute of Advanced Industrial Science and  
Technology, Tsukuba, Ibaraki 305-8568, Japan*

\* **Corresponding authors:** Daisuke Asakura, Eiji Hosono

Email address: [daisuke-asakura@aist.go.jp](mailto:daisuke-asakura@aist.go.jp), [e-hosono@aist.go.jp](mailto:e-hosono@aist.go.jp) Tel: +81-29-861-3489, Fax: +81-  
29-861-3489,

Address: Research Institute for Energy Conservation, National Institute of Advanced Industrial Science  
and Technology, Tsukuba, Ibaraki 305-8568, Japan

**Present Address**

<sup>#</sup>Yusuke Nanba: Inamori Frontier Research Center, Kyushu University, Nishi-ku, Fukuoka 819-0395,  
Japan

### XRD patterns and calculated lattice parameters

Figure S1 shows the *ex situ* XRD patterns for  $\text{LiMn}_2\text{O}_4$  (LMO) and  $\text{LiAl}_{0.2}\text{Mn}_{1.8}\text{O}_4$  (LAMO). The synchrotron radiation (SR) measurements for LAMO were carried out at BL19B2, SPring-8. The wavelength  $\lambda$  of X-rays was set to 0.501 Å. On the other hand, Bruker D8 Advance with a  $\text{Cu } K\alpha$  X-ray was used for XRD measurements of LMO. We calculated the lattice parameters using the indexes of LMO with a cubic symmetry (Fig. S2). They correspond to Table 1 in the text.

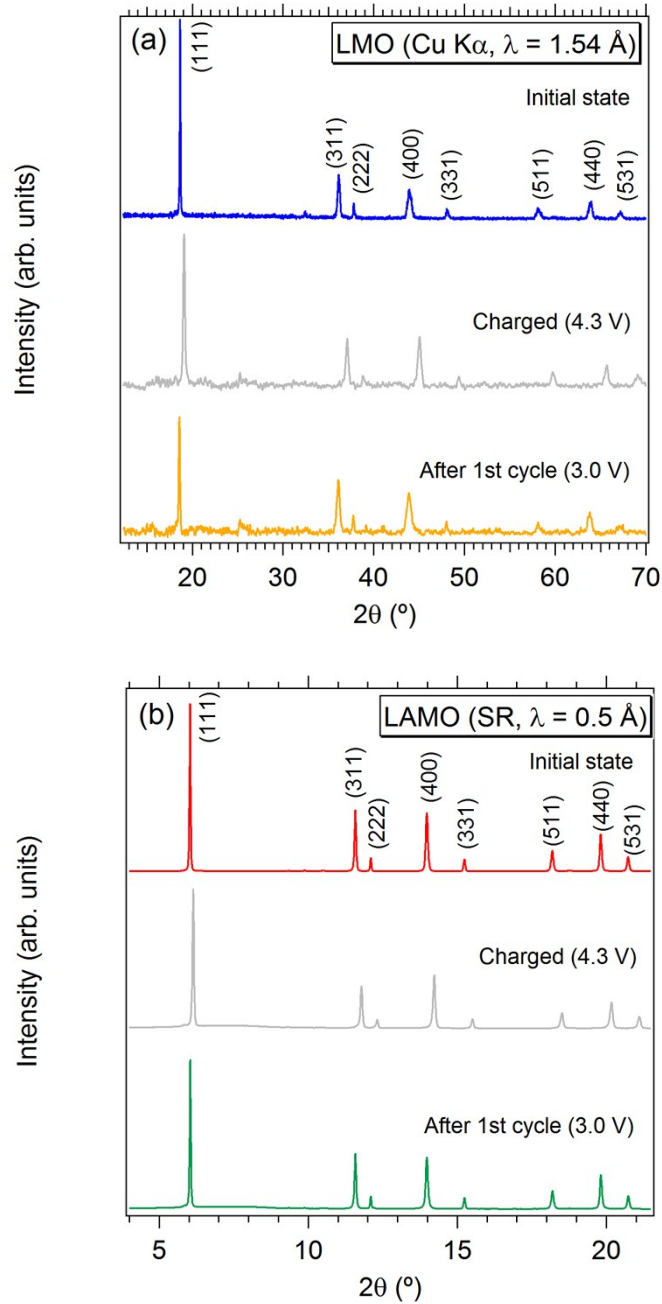

**Fig. S1** XRD patterns for (a) LMO and (b) LAMO.

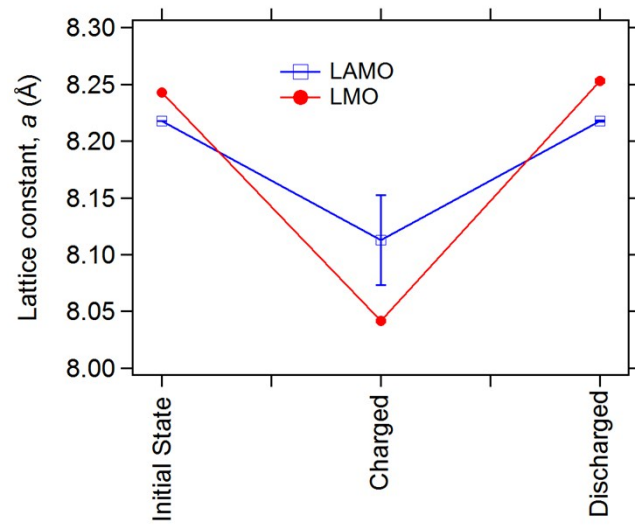

**Fig. S2** Calculated lattice parameters.
